# Supplementary material for: Two low-dimensional Schiff base copper(i/ii) complexes: synthesis, characterization and catalytic activity for degradation of organic dyes
Source: Royal Society of Chemistry journal article supplement (doi:10.1039/c4ce01207k), 2014-06-23

## Supporting Information

### **Two low-dimensional Schiff base copper(I/II) complexes: syntheses, characterization and catalytic activity for degradation of organic dyes**

Xu-Jia Hong,<sup>a,b</sup> Xiang Liu,<sup>a</sup> Jing-Bo Zhang,<sup>a</sup> Xiao Wu,<sup>a</sup> Chu-Ling Lin,<sup>a</sup> Yan-Jun Ou,<sup>a</sup> Jian Yang,<sup>a</sup> Hong-Guang Jin,<sup>a</sup> and Yue-Peng Cai\*<sup>a,b</sup>

<sup>a</sup>*School of Chemistry and Environment, South China Normal University;*

*Guangzhou Key Laboratory of Materials for Energy Conversion and Storage, Guangzhou 510006,*

*P.R. China. Fax: +86-020-39310; Tel: +86-020-39310383; E-mail: [caiyyp@scnu.edu.cn](mailto:caiyyp@scnu.edu.cn)*

<sup>b</sup>*State Key Laboratory of Structure Chemistry, Fujian, Fuzhou 350002, PR China*

## Content

**Table S1** Crystal data and structure refinement of three compounds **1**, **2** and **3**.

**Table S2** Selected bond lengths and angles for three compounds **1**, **2** and **3**.

**Table S3** Distances (Å) and angles (°) of hydrogen bonds for three compounds **1**, **2** and **3**.

**Figure S1** in **2**, (a) 1-D supramolecular belt with width of 23.98 Å assembled via

intermolecular  $\pi$ - $\pi$  stacking interaction from two centroid distance between two pyridyl rings of two adjacent molecules. (b) 1-D supramolecular belt with width of 23.98 Å assembled via intermolecular hydrogen bonding C(O)-H $\cdots$ I(N,O) interactions.

**Figure S2** Time-dependent concentration changing curves from catalytic degradation of organic dyes catalyzed by **1-3**, Hpop and Cu<sub>2</sub>I<sub>2</sub>, (a) the reaction containing rhodamine (RhB) upon no visible-light illumination, (b) the reaction containing rhodamine (RhB) upon visible-light illumination, (c) the reaction containing methylene blue (MB) upon visible-light illumination, (d) the reaction containing methyl orange (MO) upon visible-light illumination.

**Figure S3** Time-dependent concentration changing curves from catalytic degradation of organic dyes catalyzed by **1-3** after repeating five times, (a) the reaction containing rhodamine (RhB) upon visible-light illumination, (b) the reaction containing methylene blue (MB) upon visible-light illumination, (c) the reaction containing methyl orange (MO) upon visible-light illumination.

Table S1 Crystal data and structure refinement of three compounds 1, 2 and 3.

|                                                                           | <b>1</b>                                                                                       | <b>2</b>                                                                                          | <b>3</b>                                                                                      |
|---------------------------------------------------------------------------|------------------------------------------------------------------------------------------------|---------------------------------------------------------------------------------------------------|-----------------------------------------------------------------------------------------------|
| Chemical formula                                                          | C <sub>40</sub> H <sub>48</sub> Cu <sub>4</sub> I <sub>4</sub> N <sub>16</sub> O <sub>10</sub> | C <sub>88</sub> H <sub>108</sub> Cu <sub>10</sub> I <sub>10</sub> N <sub>36</sub> O <sub>17</sub> | C <sub>42</sub> H <sub>47</sub> Cu <sub>6</sub> I <sub>6</sub> N <sub>17</sub> O <sub>8</sub> |
| <i>M</i>                                                                  | 1674.70                                                                                        | 3846.50                                                                                           | 2060.61                                                                                       |
| Crystal system                                                            | Tetragonal                                                                                     | Triclinic                                                                                         | Monoclinic                                                                                    |
| Space group                                                               | <i>I4(1)/a</i>                                                                                 | <i>P</i> -1                                                                                       | <i>P2(1)/n</i>                                                                                |
| <i>a</i> /Å                                                               | 22.267(3)                                                                                      | 11.541(3)                                                                                         | 16.408(5)                                                                                     |
| <i>b</i> /Å                                                               | 22.267(3)                                                                                      | 13.901(3)                                                                                         | 23.207(7)                                                                                     |
| <i>c</i> /Å                                                               | 23.162(3)                                                                                      | 20.769(4)                                                                                         | 16.670(5)                                                                                     |
| $\alpha$ /°                                                               | 90                                                                                             | 91.178(3)                                                                                         | 90                                                                                            |
| $\beta$ /°                                                                | 90                                                                                             | 90.148(3)                                                                                         | 98.473(5)                                                                                     |
| $\gamma$ /°                                                               | 90                                                                                             | 107.497(3)                                                                                        | 90                                                                                            |
| <i>V</i> /Å <sup>3</sup>                                                  | 11485(2)                                                                                       | 3177.2(11)                                                                                        | 6278(3)                                                                                       |
| <i>Z</i>                                                                  | 8                                                                                              | 1                                                                                                 | 4                                                                                             |
| <i>T</i> /K                                                               | 298(2)                                                                                         | 298(2)                                                                                            | 298(2)                                                                                        |
| <i>F</i> (000)                                                            | 6464                                                                                           | 1844                                                                                              | 3896                                                                                          |
| <i>D</i> <sub>calcd</sub> / gcm <sup>-3</sup>                             | 1.937                                                                                          | 2.010                                                                                             | 2.180                                                                                         |
| $\mu$ /mm <sup>-1</sup>                                                   | 3.676                                                                                          | 4.137                                                                                             | 5.006                                                                                         |
| $\lambda$ /Å                                                              | 0.71073                                                                                        | 0.71073                                                                                           | 0.71073                                                                                       |
| <i>R</i> <sub>int</sub>                                                   | 0.0716                                                                                         | 0.0352                                                                                            | 0.0806                                                                                        |
| data/restraint/parm                                                       | 5220 / 6 / 361                                                                                 | 11324 / 0 / 742                                                                                   | 11355 / 2 / 725                                                                               |
| GOF                                                                       | 1.012                                                                                          | 0.989                                                                                             | 1.002                                                                                         |
| <i>R</i> <sub>1</sub> [ <i>I</i> = 2 $\sigma$ ( <i>I</i> )] <sup>a</sup>  | 0.0591                                                                                         | 0.0655                                                                                            | 0.0589                                                                                        |
| <i>wR</i> <sub>2</sub> [ <i>I</i> = 2 $\sigma$ ( <i>I</i> )] <sup>b</sup> | 0.1323                                                                                         | 0.1614                                                                                            | 0.1398                                                                                        |
| <i>R</i> <sub>1</sub> [all data] <sup>a</sup>                             | 0.0993                                                                                         | 0.1080                                                                                            | 0.0958                                                                                        |
| <i>wR</i> <sub>2</sub> [all data] <sup>b</sup>                            | 0.1712                                                                                         | 0.1863                                                                                            | 0.1799                                                                                        |
| Largest diff. peak<br>and hole (e <sup>-</sup> Å <sup>-3</sup> )          | 1.170 and -0.897                                                                               | 0.814 and -0.759                                                                                  | 1.114 and -1.224                                                                              |

<sup>a</sup>  $R_1 = \sum ||F_o| - |F_c|| / \sum |F_o|$ , <sup>b</sup>  $wR_2 = [\sum w(F_o^2 - F_c^2)^2 / \sum w(F_o^2)^2]^{1/2}$ , where  $w = 1 / [\sigma^2(F_o^2) + (aP)_2 + bP]$ .  $P = (F_o^2 + 2F_c^2) / 3$ .

**Table S2.** Selected atomic distances (Å) and bond angles (°) for compounds **1**, **2** and **3**.

| <b>1</b>            |            |                     |            |
|---------------------|------------|---------------------|------------|
| Cu(1)-N(2)          | 1.926(3)   | O(1)#1-Cu(1)-I(1)   | 160.53(7)  |
| Cu(1)-N(4)#1        | 2.001(3)   | N(6)-Cu(2)-O(3)     | 79.14(15)  |
| Cu(1)-O(1)          | 2.013(3)   | N(6)-Cu(2)-N(8)#2   | 178.31(18) |
| Cu(1)-N(1)          | 2.027(4)   | O(3)-Cu(2)-N(8)#2   | 99.26(15)  |
| Cu(1)-O(1)#1        | 2.326(3)   | N(6)-Cu(2)-N(5)     | 80.78(17)  |
| Cu(1)-I(1)          | 3.0807(8)  | O(3)-Cu(2)-N(5)     | 159.68(15) |
| Cu(2)-N(6)          | 1.916(4)   | N(8)#2-Cu(2)-N(5)   | 100.79(17) |
| Cu(2)-O(3)          | 2.001(3)   | N(6)-Cu(2)-O(3)#2   | 105.34(15) |
| Cu(2)-N(8)#2        | 2.003(4)   | O(3)-Cu(2)-O(3)#2   | 91.84(17)  |
| Cu(2)-N(5)          | 2.022(4)   | N(8)#2-Cu(2)-O(3)#2 | 74.09(14)  |
| Cu(2)-O(3)#2        | 2.338(3)   | N(5)-Cu(2)-O(3)#2   | 90.45(15)  |
| O(1)-Cu(1)#3        | 2.326(3)   | C(8)-O(1)-Cu(1)     | 109.4(3)   |
| O(3)-Cu(2)#4        | 2.338(3)   | C(8)-O(1)-Cu(1)#3   | 109.2(3)   |
| N(4)-Cu(1)#3        | 2.001(3)   | Cu(1)-O(1)-Cu(1)#3  | 141.19(13) |
| N(8)-Cu(2)#4        | 2.003(4)   | C(18)-O(3)-Cu(2)    | 109.1(3)   |
| N(2)-Cu(1)-N(4)#1   | 174.38(15) | C(18)-O(3)-Cu(2)#4  | 109.1(3)   |
| N(2)-Cu(1)-O(1)     | 79.21(13)  | Cu(2)-O(3)-Cu(2)#4  | 141.83(15) |
| N(4)#1-Cu(1)-O(1)   | 101.93(13) | C(1)-N(1)-Cu(1)     | 128.8(3)   |
| N(2)-Cu(1)-N(1)     | 80.13(15)  | C(5)-N(1)-Cu(1)     | 111.6(3)   |
| N(4)#1-Cu(1)-N(1)   | 98.65(14)  | C(6)-N(2)-Cu(1)     | 120.7(3)   |
| O(1)-Cu(1)-N(1)     | 159.34(13) | N(3)-N(2)-Cu(1)     | 118.1(3)   |
| N(2)-Cu(1)-O(1)#1   | 100.38(12) | C(9)-N(4)-Cu(1)#3   | 124.2(3)   |
| N(4)#1-Cu(1)-O(1)#1 | 74.21(12)  | O(2)-N(4)-Cu(1)#3   | 122.6(3)   |
| O(1)-Cu(1)-O(1)#1   | 88.86(16)  | C(11)-N(5)-Cu(2)    | 130.3(4)   |
| N(1)-Cu(1)-O(1)#1   | 95.00(13)  | C(15)-N(5)-Cu(2)    | 111.5(3)   |
| N(2)-Cu(1)-I(1)     | 97.23(10)  | C(16)-N(6)-Cu(2)    | 119.6(3)   |
| N(4)#1-Cu(1)-I(1)   | 88.35(10)  | N(7)-N(6)-Cu(2)     | 118.5(3)   |
| O(1)-Cu(1)-I(1)     | 86.32(9)   | C(19)-N(8)-Cu(2)#4  | 123.7(3)   |
| N(1)-Cu(1)-I(1)     | 96.15(11)  | O(4)-N(8)-Cu(2)#4   | 122.4(3)   |
| <b>2</b>            |            |                     |            |
| Cu(1)-N(2)          | 1.915(12)  | N(14)-Cu(4)-N(12)   | 175.1(5)   |
| Cu(1)-O(1)          | 2.003(10)  | N(14)-Cu(4)-O(7)    | 79.6(5)    |
| Cu(1)-N(16)         | 2.017(12)  | N(12)-Cu(4)-O(7)    | 100.7(5)   |
| Cu(1)-N(1)          | 2.023(12)  | N(14)-Cu(4)-N(13)   | 80.3(6)    |
| Cu(1)-O(7)          | 2.327(10)  | N(12)-Cu(4)-N(13)   | 99.2(5)    |
| Cu(2)-N(6)          | 1.912(12)  | O(7)-Cu(4)-N(13)    | 159.8(5)   |
| Cu(2)-O(3)          | 1.985(10)  | N(14)-Cu(4)-O(5)    | 101.7(5)   |
| Cu(2)-N(4)          | 1.994(13)  | N(12)-Cu(4)-O(5)    | 73.5(4)    |
| Cu(2)-N(5)          | 2.015(13)  | O(7)-Cu(4)-O(5)     | 90.6(4)    |
| Cu(2)-O(1)          | 2.326(10)  | N(13)-Cu(4)-O(5)    | 91.8(5)    |
| Cu(3)-N(10)         | 1.930(12)  | N(14)-Cu(4)-I(1)    | 95.4(4)    |
| Cu(3)-N(8)          | 1.997(14)  | N(12)-Cu(4)-I(1)    | 89.5(4)    |
| Cu(3)-O(5)          | 2.012(10)  | O(7)-Cu(4)-I(1)     | 92.2(3)    |
| Cu(3)-N(9)          | 2.039(12)  | N(13)-Cu(4)-I(1)    | 91.3(4)    |
| Cu(3)-O(3)          | 2.304(10)  | O(5)-Cu(4)-I(1)     | 163.0(2)   |
| Cu(4)-N(14)         | 1.905(13)  | I(4)-Cu(5)-I(5)     | 139.3(3)   |
| Cu(4)-N(12)         | 1.991(13)  | I(4)-Cu(5)-I(5)#5   | 118.1(2)   |
| Cu(4)-O(7)          | 2.011(10)  | I(5)-Cu(5)-I(5)#5   | 102.5(2)   |
| Cu(4)-N(13)         | 2.023(14)  | Cu(5)-I(5)-Cu(5)#5  | 77.5(2)    |

|                  |            |                   |            |
|------------------|------------|-------------------|------------|
| Cu(4)-O(5)       | 2.336(10)  | C(8)-O(1)-Cu(1)   | 108.9(9)   |
| Cu(4)-I(1)       | 3.085(2)   | C(8)-O(1)-Cu(2)   | 110.9(9)   |
| Cu(5)-I(4)       | 2.475(7)   | Cu(1)-O(1)-Cu(2)  | 140.2(5)   |
| Cu(5)-I(5)       | 2.545(6)   | C(18)-O(3)-Cu(2)  | 111.1(10)  |
| Cu(5)-I(5)#5     | 2.646(6)   | C(18)-O(3)-Cu(3)  | 109.9(10)  |
| I(5)-Cu(5)#5     | 2.646(6)   | Cu(2)-O(3)-Cu(3)  | 138.9(5)   |
| N(2)-Cu(1)-O(1)  | 79.0(4)    | C(28)-O(5)-Cu(3)  | 109.0(9)   |
| N(2)-Cu(1)-N(16) | 176.1(5)   | C(28)-O(5)-Cu(4)  | 110.5(9)   |
| O(1)-Cu(1)-N(16) | 99.1(4)    | Cu(3)-O(5)-Cu(4)  | 140.4(5)   |
| N(2)-Cu(1)-N(1)  | 81.5(5)    | C(38)-O(7)-Cu(4)  | 110.0(9)   |
| O(1)-Cu(1)-N(1)  | 160.3(5)   | C(38)-O(7)-Cu(1)  | 109.8(9)   |
| N(16)-Cu(1)-N(1) | 100.2(5)   | Cu(4)-O(7)-Cu(1)  | 140.2(5)   |
| N(2)-Cu(1)-O(7)  | 102.4(5)   | C(1)-N(1)-Cu(1)   | 129.2(11)  |
| O(1)-Cu(1)-O(7)  | 91.5(4)    | C(5)-N(1)-Cu(1)   | 110.9(10)  |
| N(16)-Cu(1)-O(7) | 74.1(4)    | C(6)-N(2)-Cu(1)   | 118.5(11)  |
| N(1)-Cu(1)-O(7)  | 90.4(4)    | N(3)-N(2)-Cu(1)   | 119.6(9)   |
| N(6)-Cu(2)-O(3)  | 79.2(5)    | C(9)-N(4)-Cu(2)   | 124.5(10)  |
| N(6)-Cu(2)-N(4)  | 178.8(5)   | O(2)-N(4)-Cu(2)   | 122.6(10)  |
| O(3)-Cu(2)-N(4)  | 100.0(5)   | C(11)-N(5)-Cu(2)  | 128.2(13)  |
| N(6)-Cu(2)-N(5)  | 79.9(5)    | C(15)-N(5)-Cu(2)  | 113.4(11)  |
| O(3)-Cu(2)-N(5)  | 158.6(5)   | C(16)-N(6)-Cu(2)  | 121.4(12)  |
| N(4)-Cu(2)-N(5)  | 100.9(5)   | N(7)-N(6)-Cu(2)   | 117.2(9)   |
| N(6)-Cu(2)-O(1)  | 105.4(4)   | C(19)-N(8)-Cu(3)  | 124.4(11)  |
| O(3)-Cu(2)-O(1)  | 92.6(4)    | O(4)-N(8)-Cu(3)   | 121.4(11)  |
| N(4)-Cu(2)-O(1)  | 73.8(4)    | C(21)-N(9)-Cu(3)  | 130.1(12)  |
| N(5)-Cu(2)-O(1)  | 88.8(4)    | C(25)-N(9)-Cu(3)  | 111.3(11)  |
| N(10)-Cu(3)-N(8) | 178.5(5)   | C(26)-N(10)-Cu(3) | 119.5(11)  |
| N(10)-Cu(3)-O(5) | 79.3(5)    | N(11)-N(10)-Cu(3) | 117.6(9)   |
| N(8)-Cu(3)-O(5)  | 102.1(5)   | C(29)-N(12)-Cu(4) | 123.6(11)  |
| N(10)-Cu(3)-N(9) | 80.4(5)    | O(6)-N(12)-Cu(4)  | 122.1(9)   |
| N(8)-Cu(3)-N(9)  | 98.2(5)    | C(31)-N(13)-Cu(4) | 130.3(12)  |
| O(5)-Cu(3)-N(9)  | 159.7(5)   | C(35)-N(13)-Cu(4) | 110.3(12)  |
| N(10)-Cu(3)-O(3) | 107.0(5)   | C(36)-N(14)-Cu(4) | 121.3(12)  |
| N(8)-Cu(3)-O(3)  | 73.6(5)    | N(15)-N(14)-Cu(4) | 117.6(10)  |
| O(5)-Cu(3)-O(3)  | 91.5(4)    | C(39)-N(16)-Cu(1) | 121.9(10)  |
| N(9)-Cu(3)-O(3)  | 95.6(5)    | O(8)-N(16)-Cu(1)  | 123.7(10)  |
| <b>3</b>         |            |                   |            |
| Cu(1)-N(2)       | 1.934(8)   | O(5)-Cu(3)-I(2)   | 91.8(2)    |
| Cu(1)-O(1)       | 1.987(7)   | N(16)-Cu(3)-I(2)  | 91.2(3)    |
| Cu(1)-N(8)       | 2.002(8)   | N(9)-Cu(3)-I(2)   | 93.1(2)    |
| Cu(1)-N(1)       | 2.018(9)   | O(7)-Cu(3)-I(2)   | 163.64(18) |
| Cu(1)-O(3)       | 2.333(6)   | N(14)-Cu(4)-N(13) | 80.7(3)    |
| Cu(1)-I(1)       | 3.0182(17) | N(14)-Cu(4)-O(7)  | 80.1(3)    |
| Cu(2)-N(6)       | 1.915(8)   | N(13)-Cu(4)-O(7)  | 160.8(3)   |
| Cu(2)-O(3)       | 1.994(6)   | N(14)-Cu(4)-N(4)  | 176.8(4)   |
| Cu(2)-N(5)       | 1.997(8)   | N(13)-Cu(4)-N(4)  | 97.6(3)    |
| Cu(2)-N(12)      | 2.035(8)   | O(7)-Cu(4)-N(4)   | 101.5(3)   |
| Cu(2)-O(5)       | 2.250(7)   | N(14)-Cu(4)-O(1)  | 107.8(3)   |
| Cu(3)-N(10)      | 1.945(9)   | N(13)-Cu(4)-O(1)  | 92.7(3)    |
| Cu(3)-O(5)       | 1.995(7)   | O(7)-Cu(4)-O(1)   | 94.2(3)    |
| Cu(3)-N(16)      | 2.006(9)   | N(4)-Cu(4)-O(1)   | 74.8(3)    |
| Cu(3)-N(9)       | 2.018(10)  | I(3)-Cu(5)-I(5)   | 121.48(8)  |

|                   |            |                   |            |
|-------------------|------------|-------------------|------------|
| Cu(3)-O(7)        | 2.345(6)   | I(3)-Cu(5)-I(6)   | 120.66(8)  |
| Cu(3)-I(2)        | 3.0208(17) | I(5)-Cu(5)-I(6)   | 117.86(8)  |
| Cu(4)-N(14)       | 1.919(8)   | I(3)-Cu(5)-Cu(6)  | 177.65(10) |
| Cu(4)-N(13)       | 1.990(9)   | I(5)-Cu(5)-Cu(6)  | 58.92(6)   |
| Cu(4)-O(7)        | 2.003(6)   | I(6)-Cu(5)-Cu(6)  | 58.96(6)   |
| Cu(4)-N(4)        | 2.008(8)   | I(4)-Cu(6)-I(5)   | 118.77(8)  |
| Cu(4)-O(1)        | 2.255(7)   | I(4)-Cu(6)-I(6)   | 123.50(8)  |
| Cu(5)-I(3)        | 2.541(2)   | I(5)-Cu(6)-I(6)   | 117.72(8)  |
| Cu(5)-I(5)        | 2.559(2)   | I(4)-Cu(6)-Cu(5)  | 176.72(10) |
| Cu(5)-I(6)        | 2.578(2)   | I(5)-Cu(6)-Cu(5)  | 58.70(6)   |
| Cu(5)-Cu(6)       | 2.654(3)   | I(6)-Cu(6)-Cu(5)  | 59.05(6)   |
| Cu(6)-I(4)        | 2.539(2)   | Cu(5)-I(5)-Cu(6)  | 62.38(7)   |
| Cu(6)-I(5)        | 2.565(2)   | Cu(6)-I(6)-Cu(5)  | 61.99(7)   |
| Cu(6)-I(6)        | 2.575(2)   | C(8)-O(1)-Cu(1)   | 110.2(7)   |
| N(2)-Cu(1)-O(1)   | 78.5(3)    | C(8)-O(1)-Cu(4)   | 111.4(7)   |
| N(2)-Cu(1)-N(8)   | 173.7(4)   | Cu(1)-O(1)-Cu(4)  | 138.4(3)   |
| O(1)-Cu(1)-N(8)   | 99.1(3)    | C(18)-O(3)-Cu(2)  | 108.9(6)   |
| N(2)-Cu(1)-N(1)   | 80.8(4)    | C(18)-O(3)-Cu(1)  | 109.7(6)   |
| O(1)-Cu(1)-N(1)   | 159.1(3)   | Cu(2)-O(3)-Cu(1)  | 141.3(3)   |
| N(8)-Cu(1)-N(1)   | 101.2(4)   | C(28)-O(5)-Cu(3)  | 109.1(6)   |
| N(2)-Cu(1)-O(3)   | 100.3(3)   | C(28)-O(5)-Cu(2)  | 112.4(7)   |
| O(1)-Cu(1)-O(3)   | 88.2(3)    | Cu(3)-O(5)-Cu(2)  | 138.5(3)   |
| N(8)-Cu(1)-O(3)   | 73.7(3)    | C(38)-O(7)-Cu(4)  | 108.2(6)   |
| N(1)-Cu(1)-O(3)   | 92.4(3)    | C(38)-O(7)-Cu(3)  | 110.9(6)   |
| N(2)-Cu(1)-I(1)   | 94.7(2)    | Cu(4)-O(7)-Cu(3)  | 140.8(3)   |
| O(1)-Cu(1)-I(1)   | 93.24(19)  | C(1)-N(1)-Cu(1)   | 130.0(8)   |
| N(8)-Cu(1)-I(1)   | 91.2(2)    | C(5)-N(1)-Cu(1)   | 112.0(7)   |
| N(1)-Cu(1)-I(1)   | 91.6(2)    | C(6)-N(2)-Cu(1)   | 118.4(8)   |
| O(3)-Cu(1)-I(1)   | 164.94(17) | N(3)-N(2)-Cu(1)   | 118.9(7)   |
| N(6)-Cu(2)-O(3)   | 79.7(3)    | C(9)-N(4)-Cu(4)   | 121.9(8)   |
| N(6)-Cu(2)-N(5)   | 81.1(3)    | O(2)-N(4)-Cu(4)   | 120.5(7)   |
| O(3)-Cu(2)-N(5)   | 160.4(3)   | C(11)-N(5)-Cu(2)  | 130.4(8)   |
| N(6)-Cu(2)-N(12)  | 176.2(4)   | C(15)-N(5)-Cu(2)  | 111.5(7)   |
| O(3)-Cu(2)-N(12)  | 100.4(3)   | C(16)-N(6)-Cu(2)  | 119.6(7)   |
| N(5)-Cu(2)-N(12)  | 98.5(3)    | N(7)-N(6)-Cu(2)   | 118.1(6)   |
| N(6)-Cu(2)-O(5)   | 109.8(3)   | C(19)-N(8)-Cu(1)  | 124.1(7)   |
| O(3)-Cu(2)-O(5)   | 94.3(3)    | O(4)-N(8)-Cu(1)   | 121.7(6)   |
| N(5)-Cu(2)-O(5)   | 96.0(3)    | C(25)-N(9)-Cu(3)  | 112.8(8)   |
| N(12)-Cu(2)-O(5)  | 74.0(3)    | C(21)-N(9)-Cu(3)  | 130.8(10)  |
| N(10)-Cu(3)-O(5)  | 78.7(3)    | C(26)-N(10)-Cu(3) | 118.2(8)   |
| N(10)-Cu(3)-N(16) | 171.8(3)   | N(11)-N(10)-Cu(3) | 117.7(7)   |
| O(5)-Cu(3)-N(16)  | 101.2(3)   | C(29)-N(12)-Cu(2) | 122.8(8)   |
| N(10)-Cu(3)-N(9)  | 80.4(4)    | O(6)-N(12)-Cu(2)  | 120.3(7)   |
| O(5)-Cu(3)-N(9)   | 159.0(3)   | C(31)-N(13)-Cu(4) | 128.7(8)   |
| N(16)-Cu(3)-N(9)  | 99.1(4)    | C(35)-N(13)-Cu(4) | 112.8(7)   |
| N(10)-Cu(3)-O(7)  | 98.8(3)    | C(36)-N(14)-Cu(4) | 120.2(7)   |
| O(5)-Cu(3)-O(7)   | 87.3(3)    | N(15)-N(14)-Cu(4) | 117.5(6)   |
| N(16)-Cu(3)-O(7)  | 73.0(3)    | C(39)-N(16)-Cu(3) | 124.9(7)   |
| N(9)-Cu(3)-O(7)   | 93.6(3)    | O(8)-N(16)-Cu(3)  | 120.9(6)   |
| N(10)-Cu(3)-I(2)  | 97.0(2)    |                   |            |

\*Symmetry transformation used to generate equivalent atoms: #1 -y+5/4,x+1/4,-z+1/4;#2 -y+3/4,x-1/4,-z+3/4;#3 y-1/4,-x+5/4,-z+1/4;#4 y+1/4,-x+3/4,-z+3/4; #5 -x,-y,-z+2.

Table S3 Distances (Å) and angles (°) of hydrogen bonds for compounds **1**, **2** and **3**<sup>a</sup>.

| D-H...A                | Distance(D-H) | Distance(H...A) | Distance(D...A) | Angle(D-H...A) |
|------------------------|---------------|-----------------|-----------------|----------------|
| <b>1</b>               |               |                 |                 |                |
| O(2)-H(2)···I(1)#1     | 0.82          | 2.592(15)       | 3.297(12)       | 144.6(2)       |
| O(4)-H(4)···I(2)#2     | 0.82          | 2.593(15)       | 3.365(11)       | 158.3(1)       |
| O(5)-H(5A)···O(6)#3    | 0.85          | 1.707(14)       | 2.498(13)       | 153.7(1)       |
| O(5)-H(5B)···I(2)#4    | 0.85          | 3.035(14)       | 3.632(10)       | 129.1(2)       |
| O(6)-H(6B)···I(1)#3    | 0.85          | 3.130(15)       | 3.861(10)       | 145.4(2)       |
| C(13)-H(13)···I(1)#3   | 0.93          | 3.106(14)       | 3.869(10)       | 140.6(2)       |
| C(7)-H(7B)···I(1)#3    | 0.93          | 3.122(13)       | 3.882(10)       | 137.3(2)       |
| <b>2</b>               |               |                 |                 |                |
| O(4)-H(4)···I(5)#5     | 0.82          | 2.621(10)       | 3.293(15)       | 140.3(1)       |
| O(6)-H(6)···I(1)#6     | 0.82          | 2.592(9)        | 3.309(13)       | 147.3(2)       |
| O(8)-H(8)···I(3)#6     | 0.82          | 2.701(10)       | 3.327(13)       | 135.1(2)       |
| C(11)-H(11)···N(18)#7  | 0.93          | 2.643(10)       | 3.460(12)       | 146.9(2)       |
| C(13)-H(13)···N(17)#7  | 0.93          | 2.546(10)       | 3.310(11)       | 139.6(2)       |
| C(30)-H(30A)···N(17)#7 | 0.93          | 2.707(11)       | 3.529(11)       | 143.9(1)       |
| C(17)-H(17B)···I(4)#8  | 0.93          | 3.009(10)       | 3.939(12)       | 163.4(2)       |
| C(22)-H(22)···N(7)#9   | 0.93          | 2.707(11)       | 3.559(11)       | 151.9(2)       |
| $\pi\cdots\pi^b$       |               |                 | 3.956(11)       |                |
| <b>3</b>               |               |                 |                 |                |
| C(2)-H(2A)···I(6)#10   | 0.93          | 3.198(8)        | 3.925(7)        | 143.6(1)       |
| O(4)-H(4)···I(1)       | 0.82          | 2.621(8)        | 3.345(7)        | 148.2(1)       |
| O(8)-H(8)···I(2)       | 0.82          | 2.652(7)        | 3.329(8)        | 148.3(2)       |
| C(22)-H(22)···N(15)    | 0.93          | 2.603(8)        | 3.512(8)        | 166.3(1)       |
| C(14)-H(14)···O(8)     | 0.93          | 2.668(7)        | 3.336(7)        | 129.4(2)       |
| C(42)-H(42A)···I(4)    | 0.93          | 3.142(8)        | 3.988(8)        | 147.9(2)       |
| C(30)-H(30C)···I(1)    | 0.93          | 3.151(8)        | 3.932(8)        | 155.7(2)       |
| C(33)-H(33)···N(17)    | 0.93          | 2.734(7)        | 3.396(8)        | 128.9(2)       |
| C(37)-H(37C)···O(4)    | 0.93          | 2.644(7)        | 3.597(7)        | 171.8(2)       |

<sup>a</sup>Symmetry transformations used to generate equivalent atoms: #1  $y-1/4, -x+5/4, -z+1/4$ ; #2  $y+1/4, -x+3/4, -z+3/4$ ; #3  $-y+3/4, x+1/4, z+1/4$ ; #4  $-x+1, -y+1, -z+1$ ; #5  $x+1, y+1, z$ ; #6  $-x+1, -y+1, z$ ; #7  $x, -1+y, z$ ; #8  $-1+x, -1+y, z$ ; #9  $-x, -y, 2-z$ ; #10  $-0.5+x, 0.5-y, 0.5+z$ ; #11.

<sup>b</sup> denotes the centroid distance between two pyridyl rings from two adjacent molecules in **2**.

Figure S1

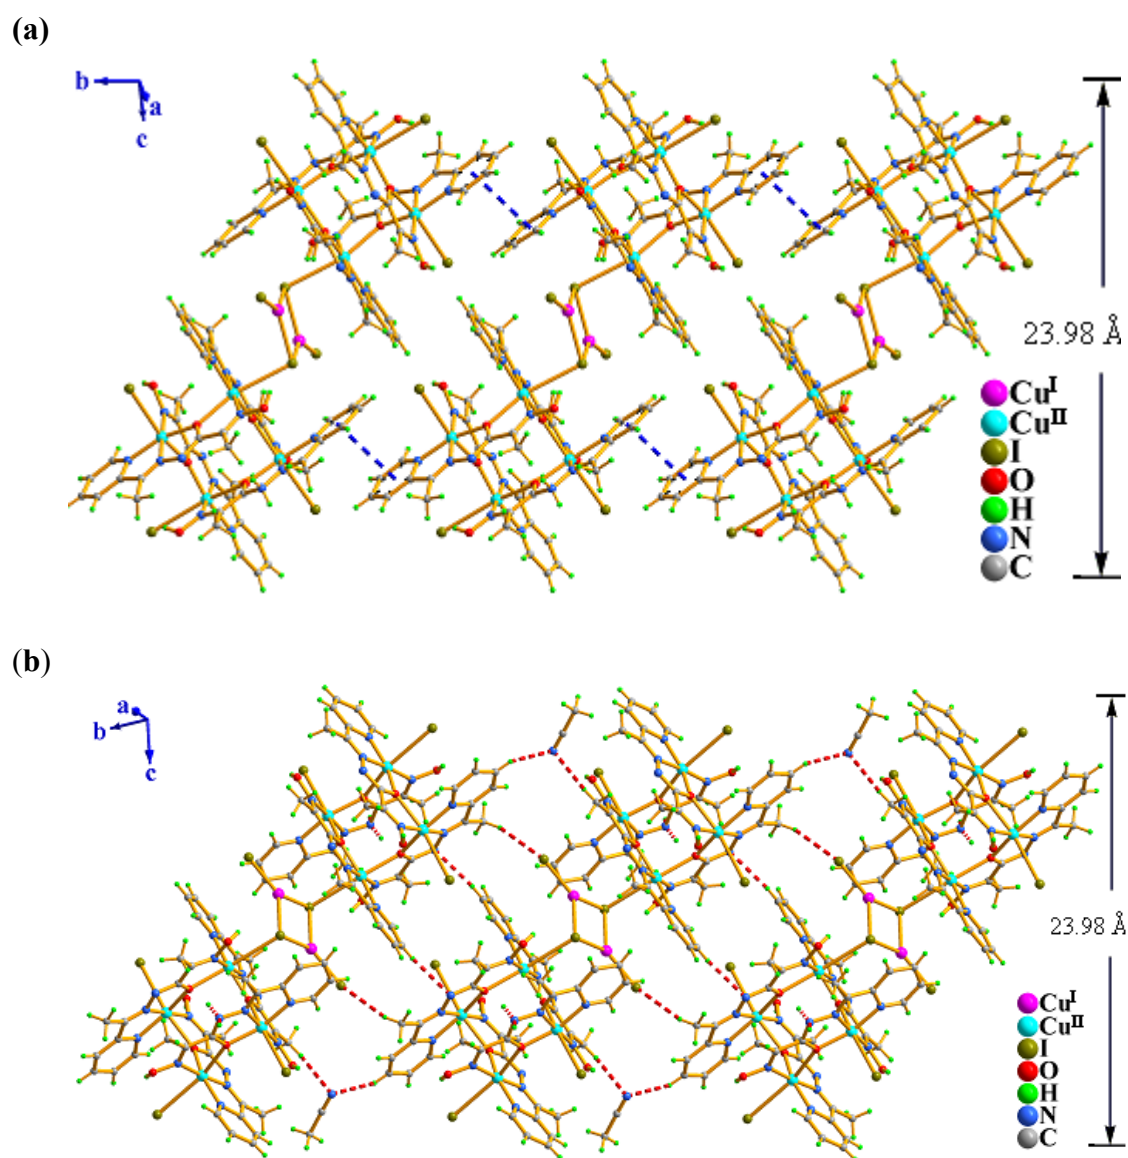



Figure S2.

(a)

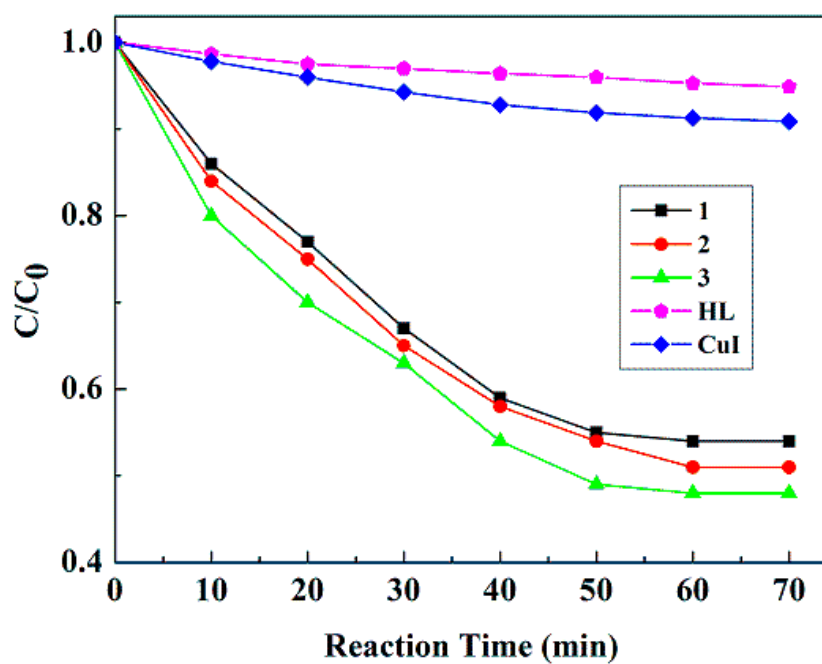

(b)

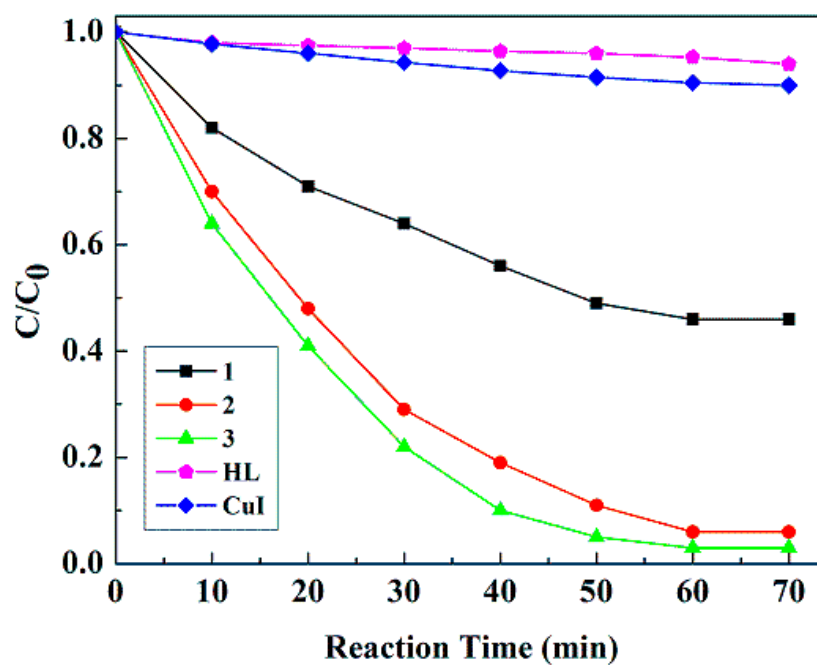

(c)

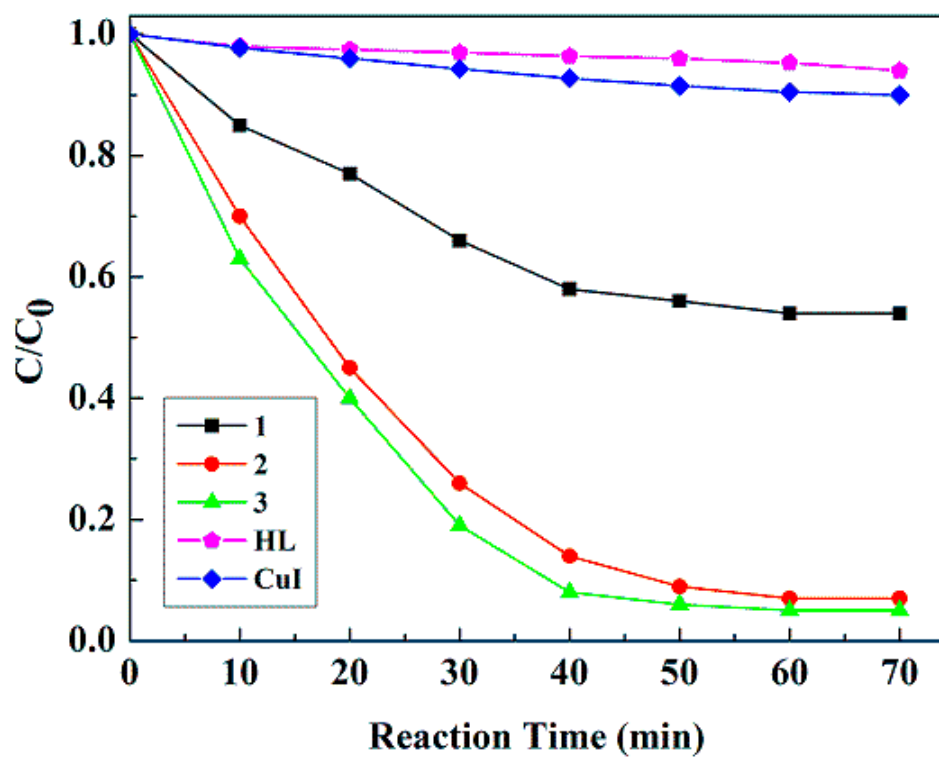

(d)

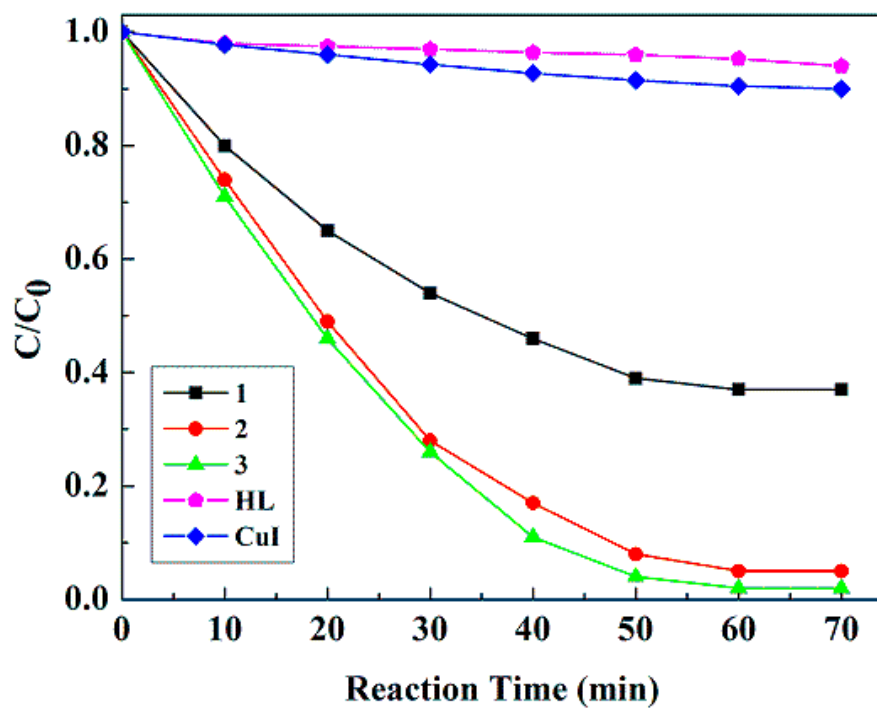

Figure S3

(a)

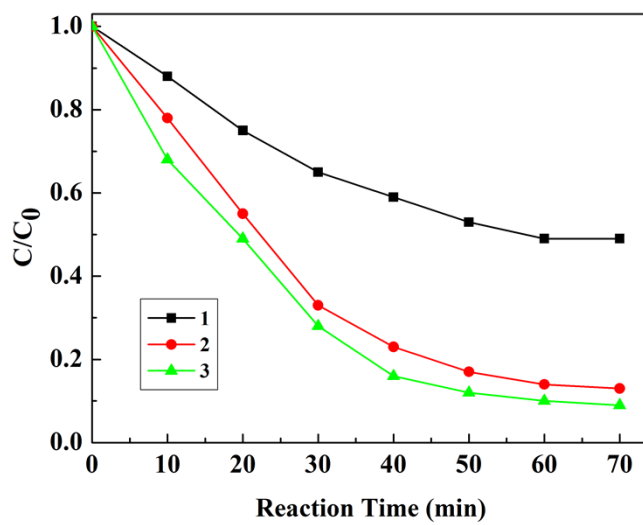

(b)

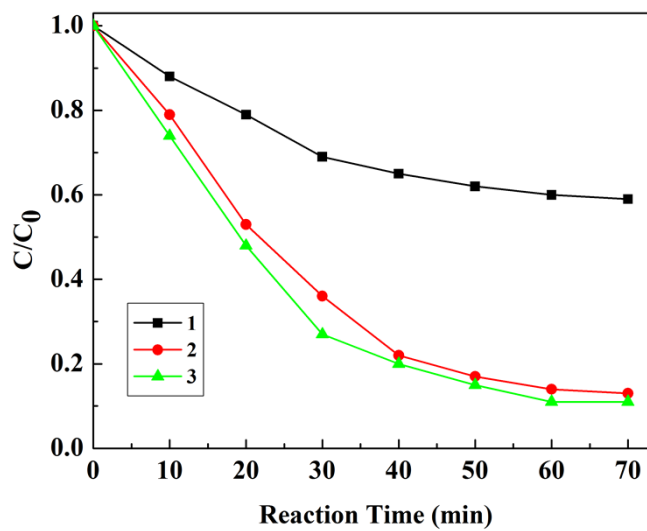

(c)

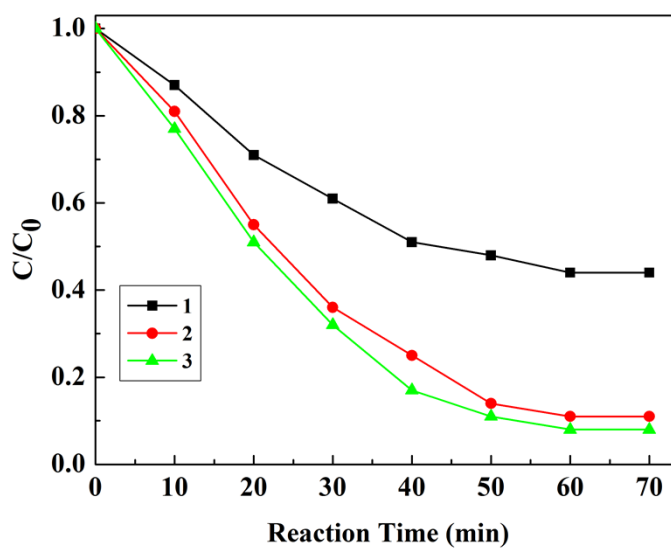

Supplement: c4ce01207k1.pdf [file c4ce01207k1.pdf]
